# Supplementary material
Source: publisher figshare collection journal article supplement (https://sage.figshare.com/ndownloader/files/31566780)
Supplement: Supplementary file 1 [file 31566780]

**Appendix A: List of Interview Participants and Interview Dates**

| **Participants** | **Affiliation** | **Owner** | **Age** | **Education[[1]](#footnote-1)** | **Interview Date** |
| --- | --- | --- | --- | --- | --- |
| Professional 1 | Language institution | Yes | 40 | Grad | 2017.01.10 |
| Professional 2 | Language institution | Yes | 68 | Under | 2017.01.14 |
| Professional 3 | Editor/Translator | No | 35 | Under | 2017.03.26 |
| Professional 4 | Education agent | No | 30 | Grad | 2017.06.23 |
| Professional 5 | Language institution | Yes | 30 | Grad | 2017.06.25 |
| Professional 6 | Education agent | Yes | 50 | Grad | 2017.07.03 |
| Professional 7 | Education agent | Yes | 35 | Grad | 2017.07.04 |
| Professional 8 | Education agent | Yes | 50 | Under | 2017.07.04 |
| Professional 9 | Language institution | Yes | 29 | Under | 2018.06.06 |
| Professional 10 | Education agent | Yes | 60 | Grad | 2018.06.21 |
| Professional 11 | Education agent | Yes | 30 | Grad | 2018.06.22 |
| Professional 12 | Education agent | Yes | 40 | Grad | 2018.06.26 |
| Professional 13 | Education agent | No | 30 | Grad | 2018.07.03 |
| Professional 14 | Editor/Translator | No | 27 | Grad | 2018.07.07 |
| Professional 15 | Education agent | Yes | 30 | Grad | 2018.07.15 |
| Professional 16 | Education agent | Yes | 50 | Grad | 2018.07.19 |
| Professional 17 | Education agent | No | 30 | Under | 2018.07.22 |
| Professional 18 | Education agent | No | 40 | Under | 2018.07.24 |
| Professional 19 | Editor/Translator | No | 30 | Grad | 2018.07.24 |
| Professional 20 | Language institution | Yes | 50 | Under | 2018.07.27 |
| Professional 21 | Education agent | No | 30 | Under | 2018.08.01 |
| Professional 22 | Education agent | Yes | 40 | Grad | 2018.08.02 |
| Professional 23 | Education agent | No | 40 | Under | 2018.08.05 |
| Professional 24 | Language institution | No | 26 | Grad | 2018.08.06 |
| Professional 25 | Education agent | No | 28 | Under | 2018.08.07 |
| Professional 26 | Education agent | Yes | 50 | Grad | 2018.08.08 |
| Professional 27 | Education agent | Yes | 50 | Grad | 2018.08.16 |
| Professional 28 | Education agent | No | 35 | Grad | 2018.08.18 |
| Professional 29 | Education agent | Yes | 30 | Grad | 2018.09.12 |
| Professional 30 | Education agent | Yes | 30 | Grad | 2018.09.12-13 |
| Professional 31 | Education agent | Yes | 35 | Grad | 2018.09.19 |
| Professional 32 | Language institution | Yes | 30 | Under | 2018.09.21 |
| Professional 33 | Education agent | Yes | 25 | Grad | 2018.10.6 |
| Student 1 | International Student | No | 29 | Grad | 2015.11.21 |
| Student 2 | International Student | No | 32 | Grad | 2014.11.27 |
| Student 3 | International Student | No | 36 | Grad | 2015.03.22 |
| Student 4 | International Student | No | 29 | Grad | 2016.04.01 |
| Student 6 | International Student | No | 31 | Grad | 2016.04.02 |
| Student 7 | International Student | No | 31 | Grad | 2016.04.15 |
| Student 8 | International Student | No | 32 | Grad | 2016.01.16 |
| Student 9 | International Student | No | 31 | Grad | 2015.12.15 |
| Student 10 | International Student | No | 24 | Under | 2018.09.15 |
| Student 11 | International Student | No | 31 | Grad | 2019.05.16 |
| Student 12 | International Student | No | 31 | Under | 2018.09.03 |
| Student 13 | International Student | No | 21 | Under | 2018.12.18 |
| Student 14 | International Student | No | 20 | Under | 2018.11.19 |

1. For professionals, the number listed represents those that completed the degree. For students, the degree name listed represents individuals pursuing such a degree. [↑](#footnote-ref-1)
